# Supplementary material for: Cryopreservation of human erythrocytes through high intracellular trehalose with membrane stabilization of maltotriose-grafted ε-poly(l-lysine)
Source: Royal Society of Chemistry journal article supplement (doi:10.1039/d2tb00445c), 2022-01-01
Supplement: d2tb00445c1.pdf [file d2tb00445c1.pdf]

1 Electronic Supplementary Information

2 **Cryopreservation of human erythrocytes through high**  
3 **intracellular trehalose with membrane stabilization of**  
4 **maltotriose-grafted  $\epsilon$ -poly(L-lysine)**

5 Shuhui Gao,<sup>a</sup> Qingjing Niu,<sup>a</sup> Xingwen Liu,<sup>a</sup> Chenhui Zhu,<sup>a</sup> Jinghui Chong,<sup>b</sup> Lixia Ren,<sup>a</sup>  
6 Kongying Zhu,<sup>c</sup> and Xiaoyan Yuan<sup>\*a</sup>

7 <sup>a</sup> *School of Materials Science and Engineering, Tianjin Key Laboratory of Composite and*  
8 *Functional Materials, Tianjin University, Tianjin 300350, China*

9 <sup>b</sup> *Tianjin Blood Center, Tianjin 300110, China*

10 <sup>c</sup> *Analysis and Measurement Center, Tianjin University, Tianjin 300072, China*

11 <sup>\*</sup> E-mail: yuanxy@tju.edu.cn

## 1 **Materials**

2  $\epsilon$ -Poly(L-lysine) ( $\epsilon$ -PL, average molecular weight  $\sim 4000$ ) was purchased from Nanjing  
3 Shineking Biotech Co., Ltd., China. Benzyl alcohol (BA, 99.9%) was purchased from Anhui  
4 Senrise Technology Co., Ltd., China.  $\alpha,\alpha$ -Trehalose (99% anhydrous) was provided by  
5 Beijing J&K Scientific Co., Ltd., China. 16-Doxyl-stearic acid (16-DSA) was obtained from  
6 Beijing Innochem Technology Co., Ltd., China. Pyrene (98%) was purchased from Tianjin  
7 Heowns Biochemical Technology Co., Ltd., China. Maltotriose (96%) and 6-dodecanoyl-  
8 *N,N*-dimethyl-2-naphthylamine (Laurdan,  $\geq 97\%$  HPLC) were provided by Shanghai Macklin  
9 Biochemical Co., Ltd., China. Ethyl acetate (EtOAc, AR) was obtained from Tianjin Kermel  
10 Chemical Reagent Co., Ltd., China. All chemicals were used as received without further  
11 purification.

12 Enhanced adenosine triphosphate (ATP) Assay Kit and Detergent Compatible Bradford  
13 Protein Assay Kit were supplied by Beyotime Biotechnology, China. Human 2,3-  
14 diphosphoglycerate (2,3-DPG) ELISA Kit was purchased from Nanjing Herb-Source Bio-  
15 Technology, China. Methemoglobin (MetHb) Assay Kit was supplied by Nanjing Jiancheng  
16 Bioengineering Institute, China. FITC Annexin V Apoptosis Detection Kit I (BD Biosciences,  
17 USA) was used for phosphatidylserine (PS) exposure determination.

18

## 1 Synthesis

2 The chemical structure of PL-g-M was verified by a  $^1\text{H}$  NMR spectrometer (AVANCE III  
3 TM HD 400 MHz NanoBAY, Bruker, Germany) and a FTIR spectrometer (IRtracer100,  
4 Shimadzu, Japan) using KBr pellet technique ranging from  $4000\text{ cm}^{-1}$  to  $400\text{ cm}^{-1}$ . The  
5 corresponding chemical shift ( $\delta$ , ppm) of protons in the  $^1\text{H}$  NMR spectra as well as the  
6 wavenumber of the vibration absorption bands and  $\alpha$ -glycosidic bonds in the FTIR spectra on  
7 the glycopeptide PL-g-M were displayed in Fig. S1 and Fig. S2, respectively, which had been  
8 detailedly analyzed in our previous publication.<sup>1</sup> Its molecular weight was assessed in an  
9 aqueous gel permeation chromatography (GPC, Viscotek, UK) system with HAc/NaAc  
10 ( $0.5\text{M}$ , pH 4.5) buffer as the eluent, and calibrated with the poly(ethylene glycol) standard.

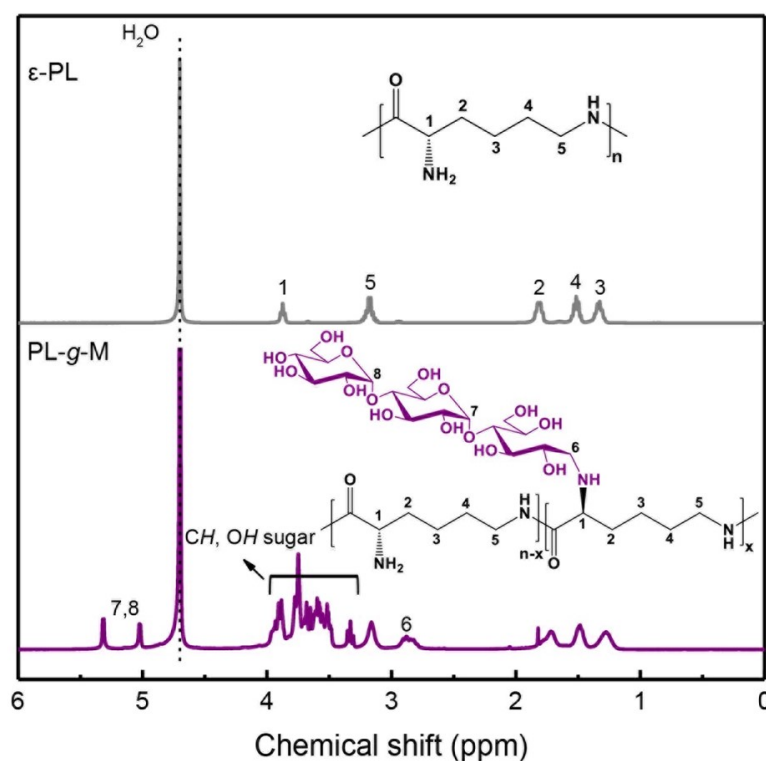

**Fig. S1**  $^1\text{H}$  NMR spectra of  $\epsilon$ -PL and PL-g-M.

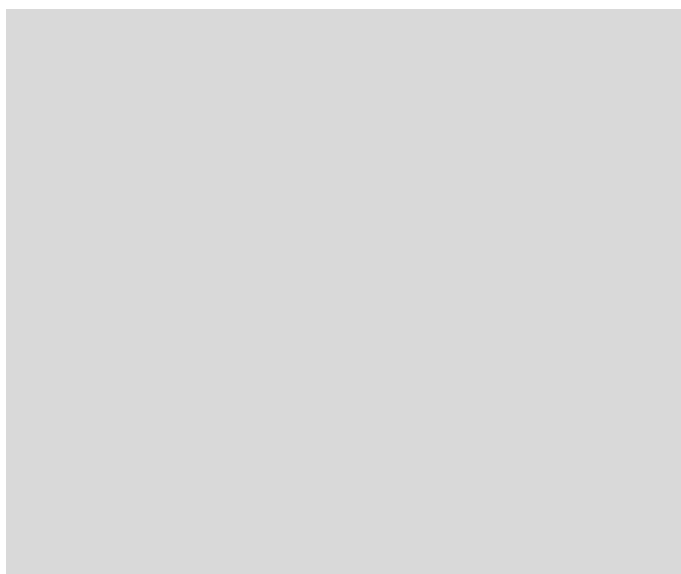

**Fig. S2** FTIR spectra of  $\epsilon$ -PL and PL-g-M.

## 1 Benzyl alcohol residue

2 For the benzyl alcohol residue determination, the supernatant after washing was mixed  
3 vigorously with ethyl acetate in equal volume, followed by centrifugation at 1800g for 10  
4 min at 4 °C. Absorbance of the supernatant at 258 nm was measured in an UV-vis  
5 spectrophotometer (UV3600 PLUS, Shimadzu, Japan) to calculate the residual benzyl alcohol  
6 amount.

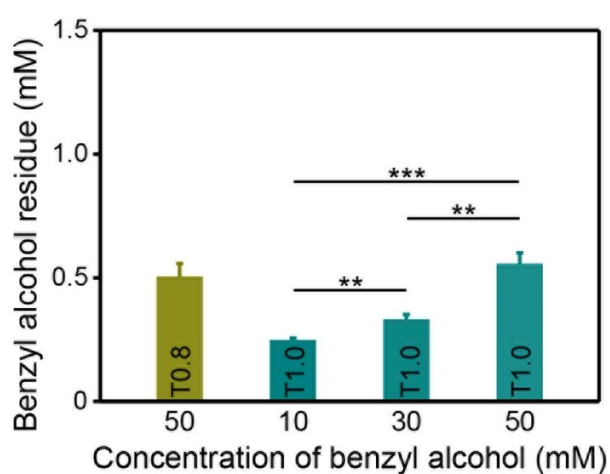

7  
8 **Fig. S3** Benzyl alcohol residue of human erythrocytes after incubation with 0.8 or 1.0 M  
9 trehalose containing different concentrations of benzyl alcohol at 4 °C for 22 h.

## 1 Hemolysis and intracellular trehalose uptake

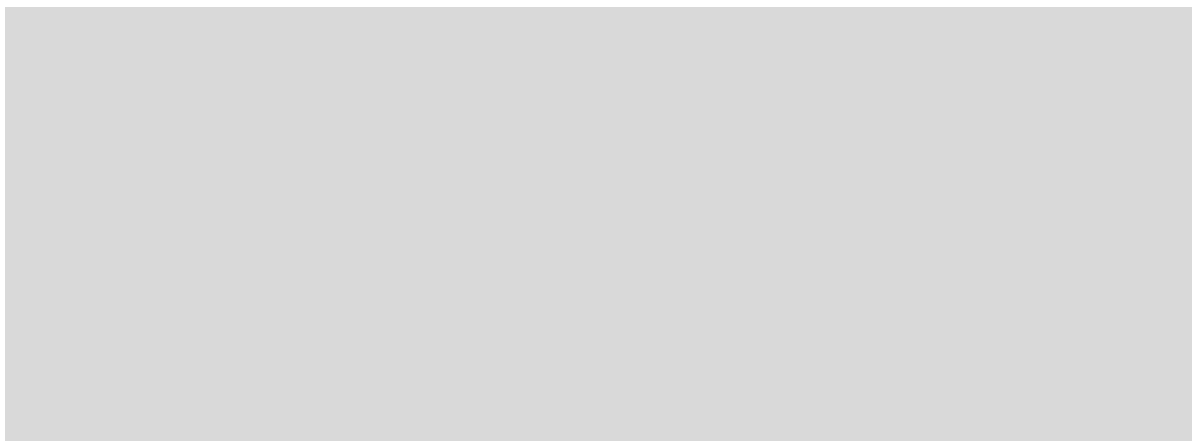

2  
3 **Fig. S4** Hemolysis (a) and intracellular trehalose (b) of human erythrocytes as a function of  
4 the incubation time after incubation with 50 mM benzyl alcohol and 0.8 or 1.0 M trehalose in  
5 PBS (pH 7.4, 100 mOsm/L) at 4 °C.

6

7

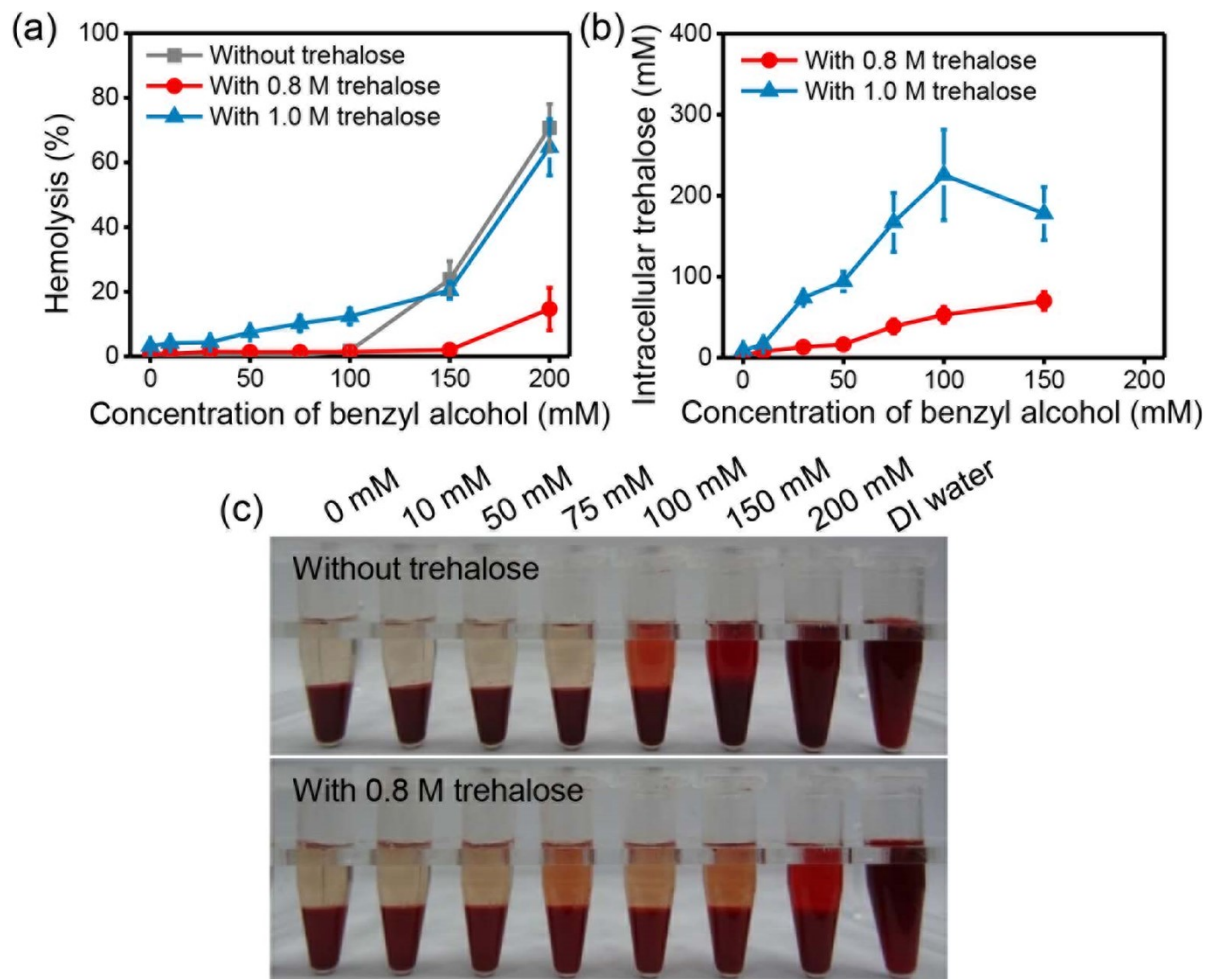

1

2 **Fig. S5** Hemolysis (a), intracellular trehalose (b) and corresponding photographs (c) of  
 3 human erythrocytes as a function of the concentration of benzyl alcohol after incubation with  
 4 0.8 or 1.0 M trehalose in PBS (pH 7.4, 100 mOsm/L) at 4 °C for 22 h.

5

# 1 Morphology

2 Erythrocytes after incubation were fixed by 2.5% glutaraldehyde and observed under a  
3 scanning electron microscope (SEM, S-4800, Hitachi, Japan) in light of the previous  
4 methods.<sup>1,2</sup>

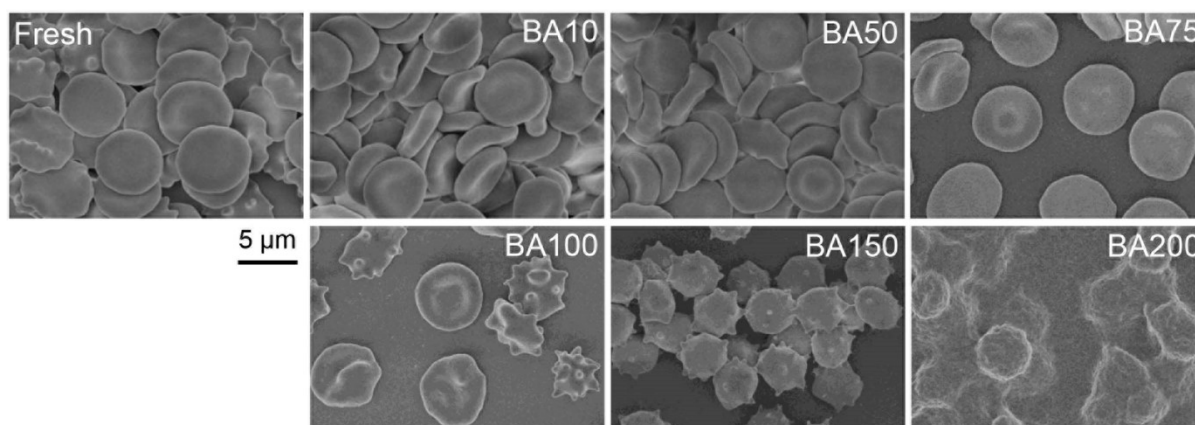

5  
6 **Fig. S6** SEM images of human erythrocytes after incubation with 0, 10, 50, 75, 100, 150 or  
7 200 mM benzyl alcohol in PBS (pH 7.4, 300 mOsm/L) at 4 °C for 22 h.

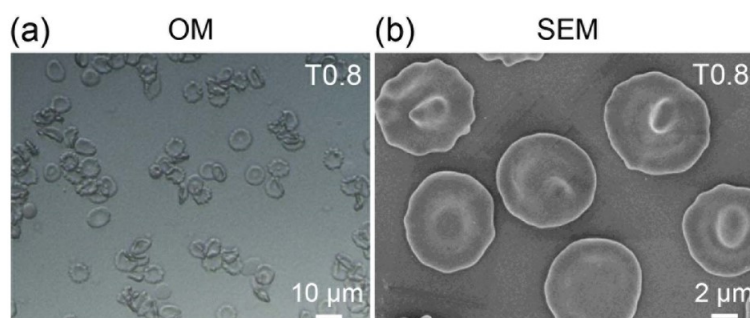

9  
10 **Fig. S7** Optical microscope photograph (a) and SEM images (b) of human erythrocytes  
11 after incubation with 0.8 M trehalose in PBS (pH 7.4, 100 mOsm/L) (T0.8) at 4 °C for  
12 22 h.

## 1 Cryopreservation

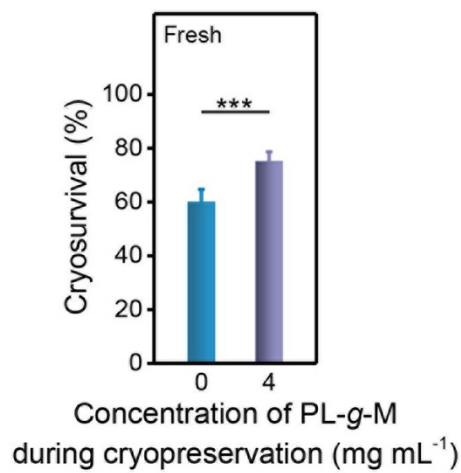

2

3 **Fig. S8** Cryosurvival of human erythrocytes by direct cryopreservation in liquid nitrogen  
4 after mixing with 0.36 M trehalose only or 0.36 M trehalose containing 4 mg/mL PL-g-M in  
5 PBS (pH 7.4, 100 mOsm/L).

6

## 1 Notes and references

2 1 S. Gao, K. Zhu, Q. Zhang, Q. Niu, J. Chong, L. Ren and X. Yuan, *Biomacromolecules*,  
3 2022, **23**, 530-542.

4 2 X. Zhang, X. Xu, Y. Li, C. Hu, Z. Zhang and Z. Gu, *Adv. Mater.*, 2018, **30**, e1707240.

5

6
